# Supplementary material for: Polypyrimidine tract-binding proteins of potato mediate tuberization through an interaction with StBEL5 RNA
Source: PubMed Central journal article supplement (PMC4623692; doi:10.1093/jxb/erv389), 2015-08-17
Supplement: supp_erv389_jexbot151878_file001.pdf [file supp_erv389_jexbot151878_file001.pdf]

**Polypyrimidine tract-binding proteins of potato mediate tuberization through an interaction with StBEL5 RNA**

Sung Ki Cho, Pooja Sharma, Nathaniel M. Butler, Il-Ho Kang, Shweta Shah, A. Gururaj Rao, and David J. Hannapel

*Supplemental Files*

Fig. S1. Amino-acid sequence alignment of polypyrimidine tract-binding (PTB) proteins of potato (*Solanum tuberosum* L.). RNA recognition motifs (RRM) are in bold. RNP1 and 2 for each RRM are underlined. CmRBP50 was identified as the core protein of a phloem-mobile RNA/protein complex in pumpkin (Ham et al., 2009).

```

StPTB6      M-----TEPSKVIHVRNVGQEISENDLLQLFQPFQVI--TKLVMLRAKNQALLQ
StPTB1      M-----SDPSKVVHVRNVGHEISENDLLQLFQPFQVI--TKLVMLRAKNQALLQ
StPTB7      MSTSGQQQFRYTQTPSKVLHLRNLPWDCSDEELVELCKPFGKIVNTKCNVGANRNQAFVE
CmRBP50     M-----TEPSKVIHVRNVGHEISENDLLQLFQPFQVI--TKLVMLRAKNQALIQ

StPTB6      MQDIAAAVNAMQFYSNV-QP-SIRGRSVYVQFSSHQELTTVDQNAQGRGDEPNRILLVSI
StPTB1      MQDVPSAVKALQFYSNV-QP-SIRGRNVYVQFSSHQELTTMDQNAQGRGDEPNRILLVTI
StPTB7      FADLNQAINMVSYYASSEPAQVRGKTVYIQYSNRNEIV----NNKSPGDVPGNVLLVTI
CmRBP50     MQDVPSAVNALQFFANV-QP-SIRGRNVYVQFSSHQELTTADQNAQGRGDEPNRILLVTI

StPTB6      HHVL-YPITVEVLHQVFSPHGIVEKIVTFQKSAGFQALIQYELTQTATISARNSLQGRNIY
StPTB1      HHML-YPITVDVLHQVFSPHGFVEKIVTFQKSAGFQALIQYQVQSSVSARNSLQGRNIY
StPTB7      EGVEAGDVSIDVIHLVFSAFGFVQKIATFEKAAGFQALIQFSDVGTASAAREALDGRSIP
CmRBP50     HHML-YPITVEVLHQVFFPHGFVEKIVTFQKSAGFQALIQYQTRQCAISARTALQGRNIY

StPTB6      -----DGCCQLDIQFSNLDELQVSYNNERPRDFTNPNLPSEPKGK-SPQQ-GYGDAGA
StPTB1      -----DGCCQLDIQFSNLDELQVNYNNERSRDYTNPNLPSEQK GK-SSQQ-GYGD---
StPTB7      KYLLPEHVNHCHLHISYSAHTDLNIKFQSHRSRDYTNPYLPVNPTAMEGVLQPVVGPDGK
CmRBP50     -----DGCCQLDIQFSNLDELQVNYNNERSRDFTNPSLPSEPKGR-PSQQPGYGDAGG

StPTB6      MYPWQSGSPRGVGFPPQMGNAAAIATAFPSGLPPGISGTNDRCTIIVSNLNP--DRIDEDK
StPTB1      MYSFQSGGAHPGGFPQMGNAEIAAAAFAGGLPPGISGTNDRCTILVSNLNS--DRINEDK
StPTB7      KK-----EPESNVLFASLENMQYAVTVDV
CmRBP50     MYALQASGAGPVGFPPQMANAAVAFAFGGLPPGVSGTNDRCTVLVSNLNP--DRIDEDK

StPTB6      LFNLFSIYGNIVRIKHL-RNKPDHALVQMGDGFQAELAVHFLKGAMLFG---QRLEVNYS
StPTB1      LFNLCSLYGNIVSIKIL-RNKPDHALVQLGDGFQAELAVHFLKGAMLFE---KRLEVNFS
StPTB7      LNTVFSAFGTVQKIAIFEKNGQTQALIQYPDVTIAAAKDALEGHCIYDGGYCKLHLSYS
CmRBP50     LFNLFSIYGNIARIKLL-RNKPDHALVQMGDGFQAELAVHFLKGAMLFG---KRLEVNFS

StPTB6      KYPNINTGPETRDYSNSNLNRFNRNAAKNYRYCCSPTKMIHVSSLPQDVTEEEIVAHLEE
StPTB1      KYPNITGPDTHDYSNSNLNRFNRNAAKNYRYCCSPTKMIHLSSLPQDVTEAEIIAHLEE
StPTB7      RHTDLNVQAYS-----KSRDYTVPESSLLAMQQAS-AVHATPPVWHNPQ
CmRBP50     KHPNITQGADTHEYANSNLNRFNRNAAKNYRYCCSPTKMIHISSLSQEVTEEEIVNLLIEE

StPTB6      HGPIVNTKLFEMNGK--QALVLFDNEEQATEALVCO-----HA
StPTB1      HGPIINSKLFEMNGK--QALVLFDKKEEQATEALVCK-----NA
StPTB7      SGPVQSSAGYATTGTVPGQAPPANPNLQGGGSTFPSAPTGYPGHSYAPPAPAYATAVHP
CmRBP50     HGPIINTKLFEMNGK--QALIMFDTEEQATEALVCK-----HA

StPTB6      T-----SLGSSIIRISFSQ-----VQSI
StPTB1      T-----SLGSSTIRISFSQ-----LQSI
StPTB7      PGSSQQTNHISTGSRPFSVSQ PFQPSTMPGGVPPPGHAPYHG
CmRBP50     S-----SLGSSIIRISFSQ-----LQSI

```

**A**

| Name     | Gene                 | Genome loci from blast | Identity                 | TC # (DFCI) |
|----------|----------------------|------------------------|--------------------------|-------------|
| StPTB1   | PGSC0003DMG400018824 | PGSC0003DMT400048465   | StPTB1                   | TC201869    |
| StPTB6   | PGSC0003DMG400023660 | PGSC0003DMT400060830   | StPTB6                   | TC202289    |
| StPTB7   | PGSC0003DMG400001427 | PGSC0003DMT400003611   | StPTB7                   | TC207584    |
| StPTB7-1 | PGSC0003DMG400009106 | PGSC0003DMT400023506   | TC201749                 | TC201749    |
| StPTB7-2 | PGSC0003DMG400002353 | PGSC0003DMT400023506   | homologous to PTB7 clade | BI920231    |
| StPTB7-3 | PGSC0003DMG400019613 | PGSC0003DMT400050479   | homologous to PTB7 clade | TC218925    |

**B**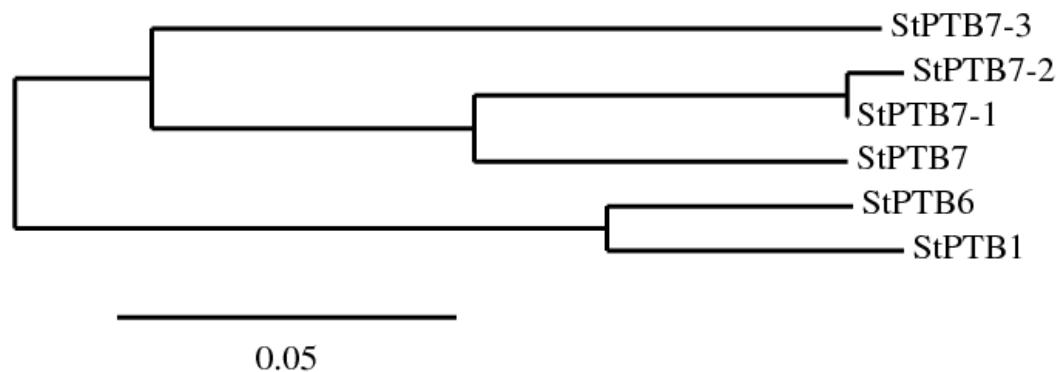

**Figure S2.** Classification and accession numbers of the gene family of polypyrimidine tract-binding (PTB) proteins of potato (A). Four proteins containing only three RNA-recognition motifs (RRMs) are from the PTB7 group (Supplementary Fig. S3), whereas PTB1 and -6 contain four RRMs and are similar in sequence to CmRBP50 (B) (Ham et al., 2009). As a comparison, *Arabidopsis* has one RBP50-type and two PTB7-types. Gene and Genome loci numbers are from the potato genome website (<http://potatogenomics.plantbiology.msu.edu/index.html>). TC accession numbers are from the DFCI Potato Gene Index (<http://compbio.dfci.harvard.edu/tgi/cgi-bin/tgi/gimain.pl?gudb=potato>).

**Figure S3.** Phylogenetic relationship of PTB proteins in plants. The deduced amino-acid sequences from the full-length cDNAs for *StPTB1*, -6, -7 and TC201749 were compared to 56 PTB protein sequences. Two other *StPTBs* (BI920231, TC218925) were identified from the Potato Genome Consortium website. Conserved RRM domains characteristic of PTB proteins were also identified using BLAST. For comparison to other plant PTB proteins, 56 protein sequences from 15 plants (Supplementary Table S2) were analyzed along with HnRNP, human PTB, as a control. Amino-acid sequence alignments and phylogenetic analysis were performed using T-COFFEE (<http://www.ch.embnet.org/software/TCoffee.html>) and graphical representation of the phylogenetic tree was performed with TreeDyn (v198.3) (Dereeper et al., 2008).

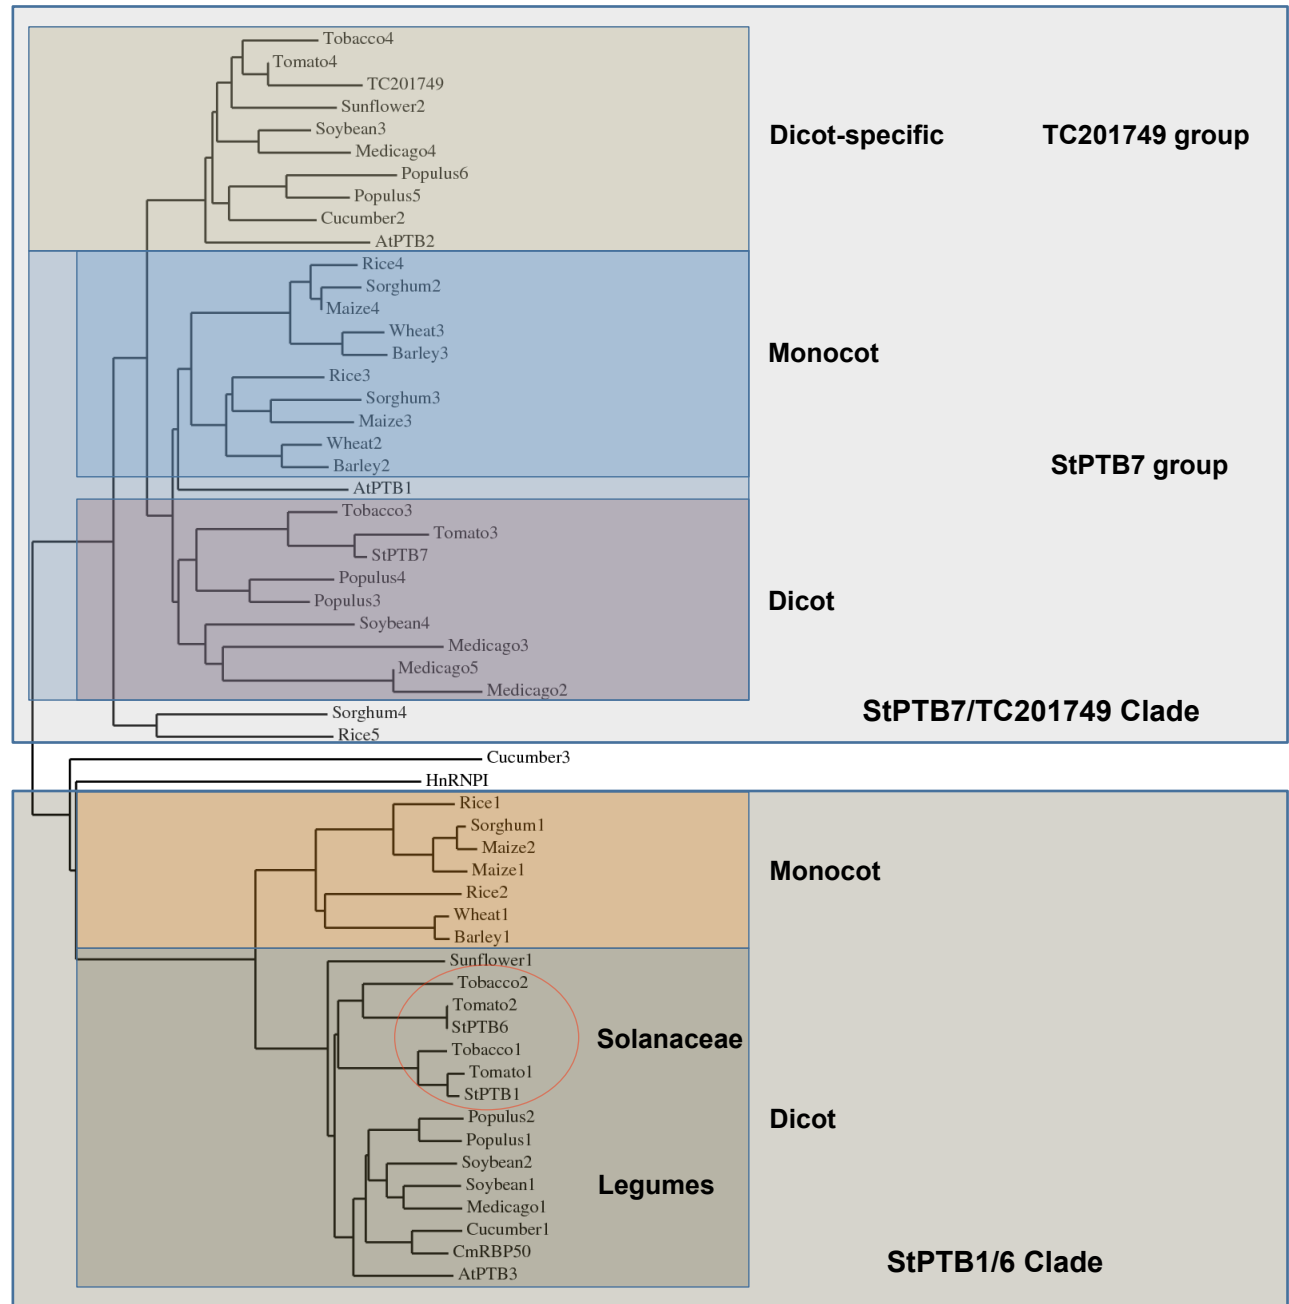

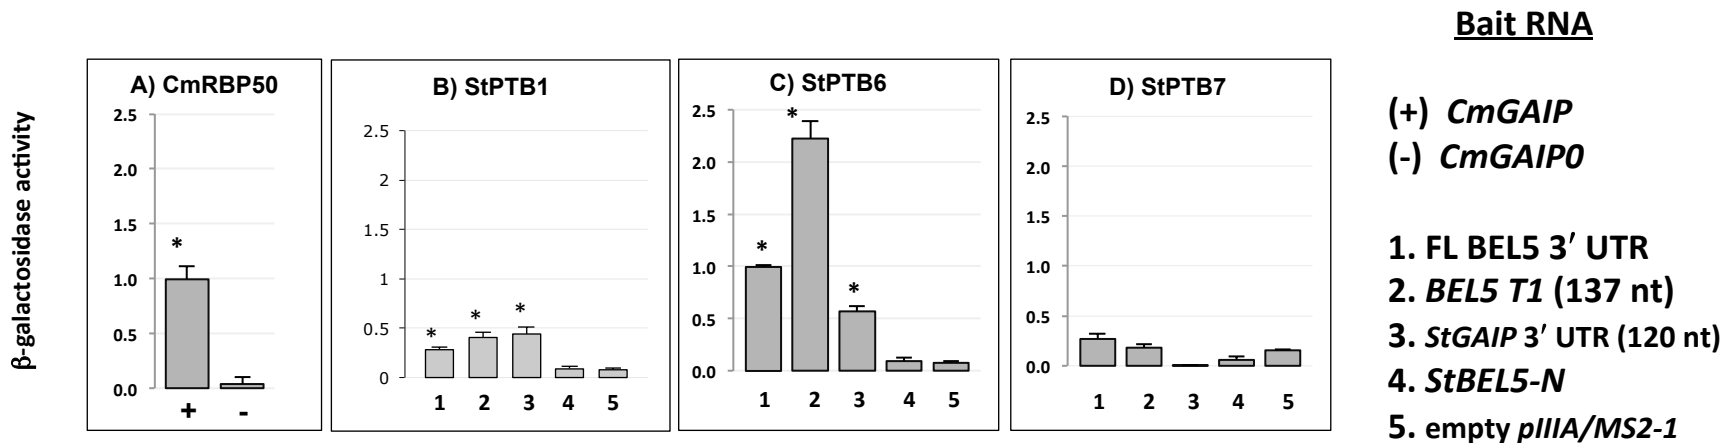

**Figure S4. Yeast three-hybrid analysis.** The yeast three-hybrid system (Bernstein et al., 2002) was utilized to assess the interaction of putative bait RNAs with CmRBP50, StPTB1, StPTB6, and StPTB7 proteins (A-D). Bait RNAs were known mobile RNAs: 1. *StBEL5* 3' UTR; 2. *StBEL5* T1; 3. *StGAIP* 3' UTR; 4. *StBEL5-N*; 5. *pIIIA/MS2-1* empty vector. The bait RNAs tested were *CmGAIP* with CmRBP50 as a positive control, full-length *BEL5* 3' UTR (503 nt), the T1 fragment of the *StBEL5* 3' UTR (137 nt), and a fragment of the 3' UTR of *StGAIP* (120 nt) with the StPTB proteins. As negative controls, *CmGAIP0* (no CU motifs, Ham et al., 2009), a cds fragment (*StBEL5-N*) of *StBEL5* (no CU motifs), and empty *pIIIA/MS2-1* vector were used. *CmGAIP*, *StGAIP*, and *T1* contain 6, 5, and 5 CU motifs, respectively (Supplementary Fig. S5). Based on  $\beta$ -galactosidase activity, the strongest interactions occurred with CmRBP50/*CmGAIP* and StPTB6/*T1* (A, C). Although, the interaction of StPTB1/full-length *BEL5* 3' UTR, T1 and *StGAIP* were statistically significant (B),  $\beta$ -galactosidase activity was relatively low in these interactions compared to the strongest interactions of CmRBP50/*CmGAIP* and StPTB6/*T1*. No significant interaction of StPTB7 protein with any of the RNA baits was observed (D).

For the yeast three-hybrid constructs, the coding sequences for StPTB1, -6 and -7 were generated by PCR amplification (Supplementary Table S4-1) and introduced into *pACTII*, an activation domain vector. DNA fragments encoding various RNA baits were amplified by PCR with gene-specific primers (Supplementary Table S4-2) and cloned into the *pIIIA/MS2-1* vector to generate the hybrid RNAs. The host yeast strain YBZ-1 was utilized with RNA hybrid plasmids by the standard yeast protocol (Bernstein et al., 2002). To determine RNA-protein interaction, *HIS3* and *lacZ* were utilized as reporters. Induction of the *lacZ* reporter gene was measured with a Yeast  $\beta$ -galactosidase Assay Kit (Pierce Biotechnology).  $\beta$ -galactosidase activity was determined by following the equation;  $[1,000 \times OD_{420}]/[\text{time of color reaction (min)} \times \text{volume of cells used (ml)} \times OD_{660}]$ . Each assay was replicated in three independent experiments. The YBZ-1 strains, plasmids *pIIIA/MS2-1* and *pACTII* were generous gifts of Dr. Marvin Wickens, University of Wisconsin, Madison.

A) T1 sequence

**ACUCUUAUAUUGUGUGAGGCCUUCUGGCCCAAGUCGGAGGACCCAAUUUGAUACAACCU**  
**AUCAUAGGAGAAAAGAAGUGGAGACUAAAUUAAAGUAACAAAUUUUAAAGCACACUUU**  
**CUAGUAUAUAUACUUCUUU**

B) StGAI bait

**UUUAAGUCAGCCUCUUUAUUUACUUUUUAACCACUUCUUAUAUUUUGUUCUAGUUUA**  
**UUUUUUUUUAUUUAUCUUA**

C) Negative control StBEL5 N

UGAAGAGGUGGAGCAAAGGUACAGACAGUACCAUCACCAAUGCAAUAAUUGUAUUUAU  
CAUUUGAGCAAGUAGCAGGAAUUGGAUCAGCCAAAUCAUACA

D) 3' UTR of *StBEL22*

**UUUUAAGAUAGUGUAUUCAAACACUGCUACAUAUUUAUGAUUUUAUAUAUAUAUAUU**  
**GUCAUCCGAUUAGUUU**

**Figure S5.** RNA bait sequences used for the yeast 3-hybrid and gel-shift assays (Supplementary Fig. S4; Figure 1). The *T1* sequence (A) is 137 nt in length from the 3' UTR of *StBEL5*, is near the 5' end of the UTR, and contains five cytosine/uracil motifs. The *StGAI* bait (B) is 77 nt from the 3' UTR of *StGAI* and contains five cytosine/uracil motifs. The negative control *StBEL5 N* (C) is 101 nt from the *StBEL5* cds, near the amino-terminus and contains no cytosine/uracil motifs longer than 2 nt. (D) is the 74-nt 3' UTR of *StBEL22*. Cytosine/uracil runs of at least 3 nt are shown in bold.

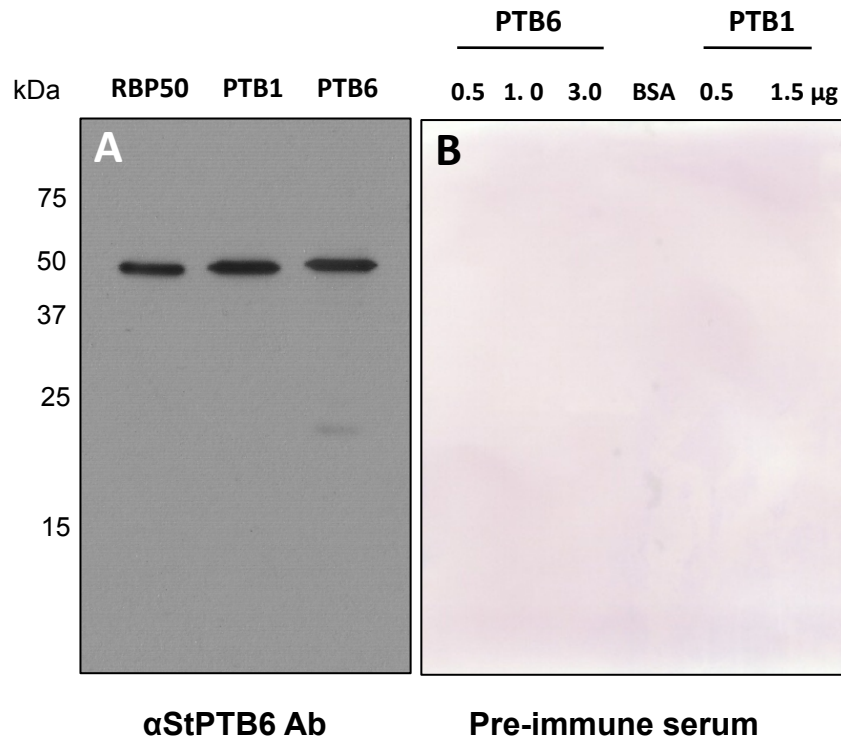

**Figure S6.** Detection of purified recombinant PTB proteins using anti-PTB6 antibody. One microgram of purified CmRBP50, StPTB1 or -6 protein was separated via SDS-PAGE. After blotting and incubation with antibody, all three proteins were readily detected by the anti-PTB6 antibody (A). The antibody was diluted 1:10,000 and the pre-immune serum 1:1,000 (B) for the immunodetection protocols used here.

**A**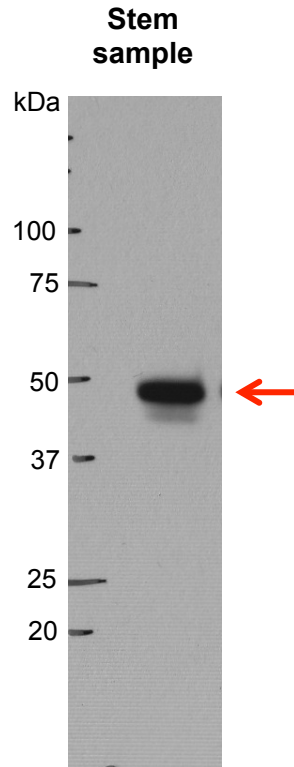**B**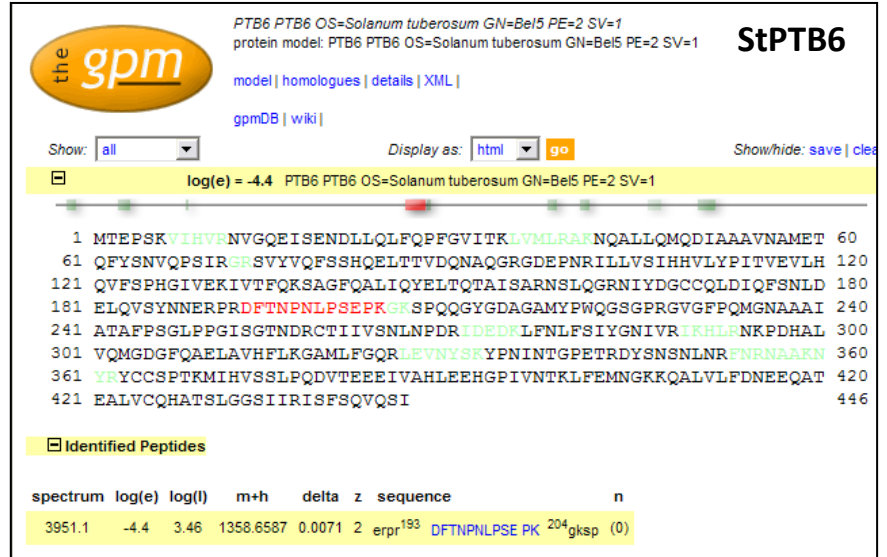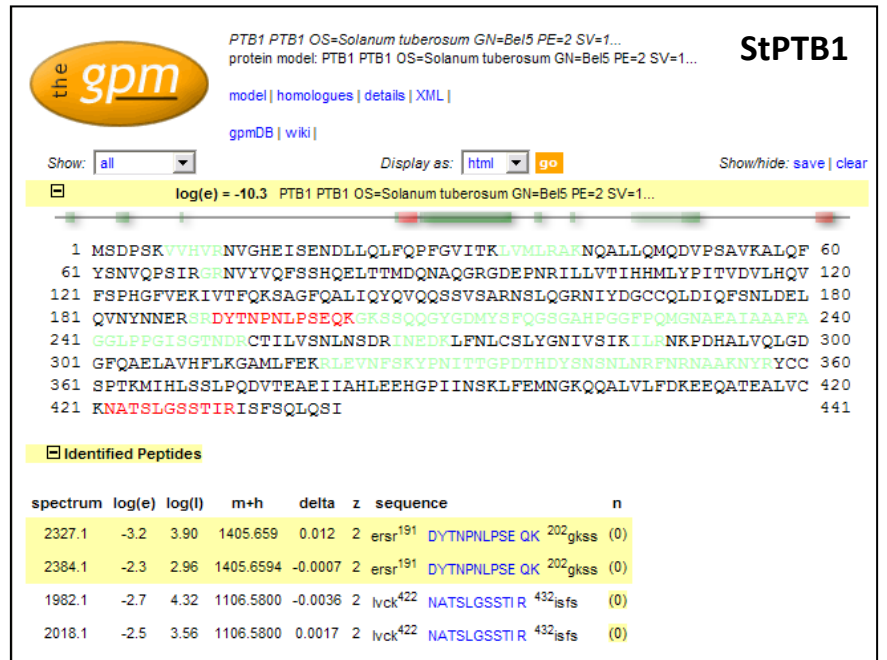

**Figure S7.** Identification of reactive protein bands recognized by the anti-PTB6 antibody. Total protein was extracted from various tissues of the potato cv. Désirée and separated via SDS-PAGE. The band of approximately 48 kDa recognized by the anti-PTB6 antibody (A, red arrow) was excised for analysis. Sample preparation and in-gel trypsin digestion were performed and peptides were identified by using LC-MS/MS as described previously (Shah et al., 2011). The reactive band contained both StPTB1 and -6 proteins (B).



Figure S8

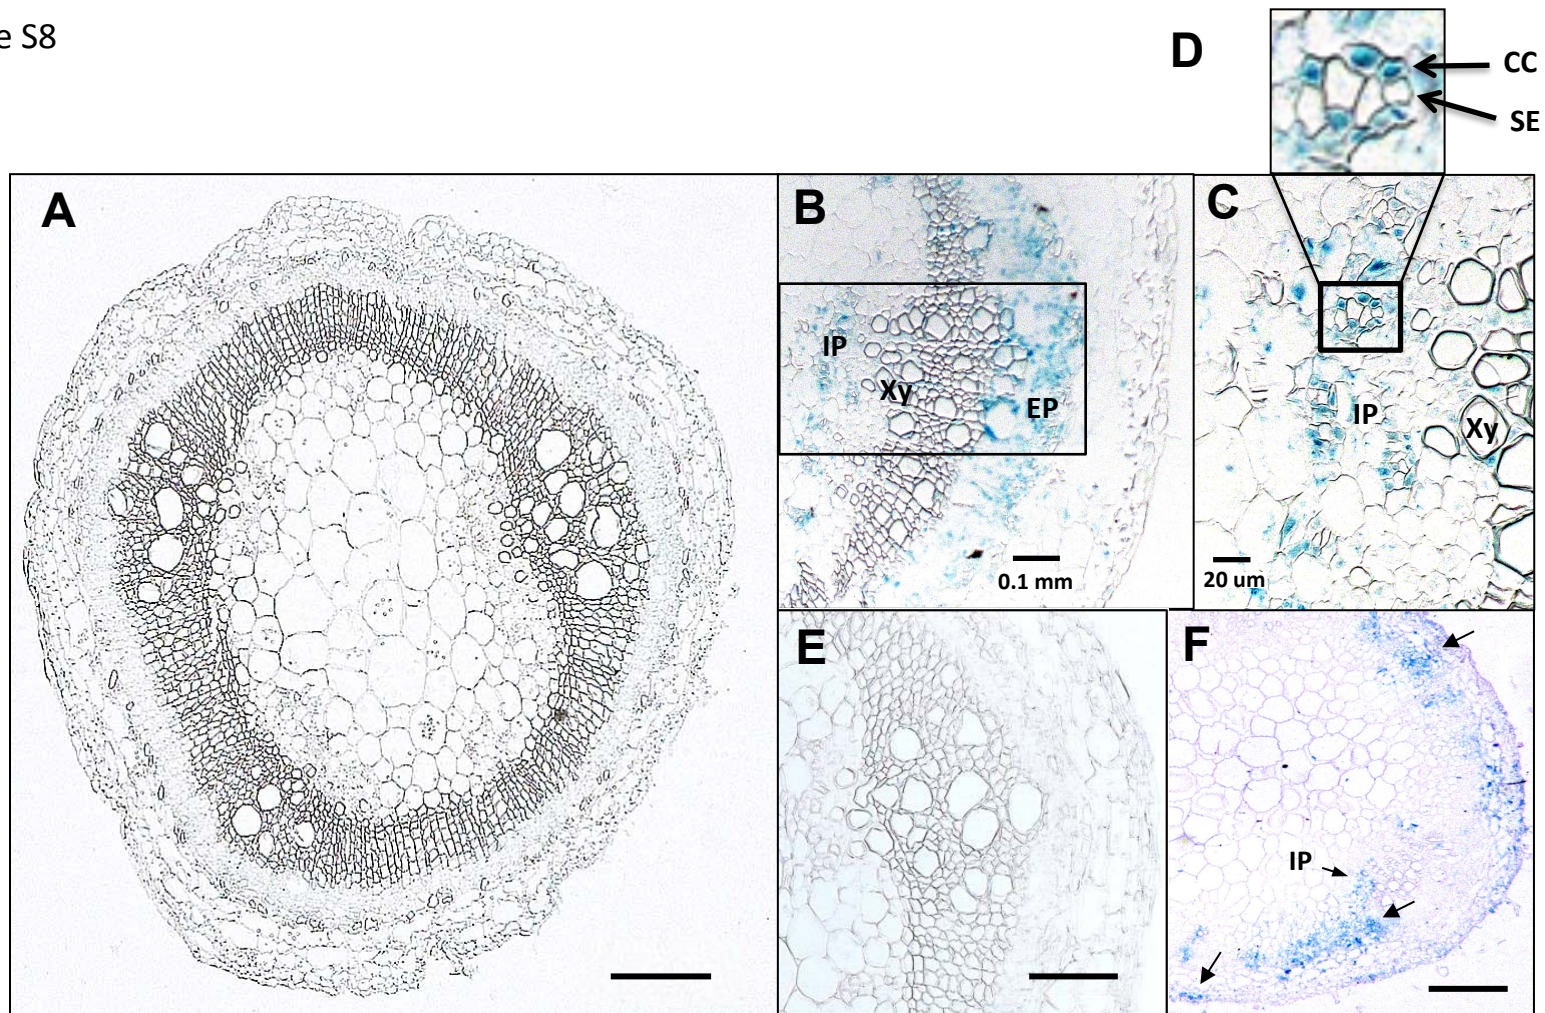

**Figure S8.** Localization of GUS activity within stems of *StPTB1<sub>prom</sub>* (A-D) and *StPTB6<sub>prom</sub>* (E-F) transgenic lines. Stem internodes of four-week old soil grown plants were embedded in paraffin for histochemical detection of GUS activity within tissues of the stem. Panel (A) is a transverse section of *StPTB1<sub>prom</sub>* with a higher magnification image of a vascular bundle (boxed area) in (B) showing xylem (Xy) and internal (IP) and external (EP) phloem tissues (C-D). Panels (E-F) are higher magnification images of a transverse section of *StPTB6<sub>prom</sub>* showing a vascular bundle in (E) and GUS staining in the interfascicular region, the IP, and the epidermis (F, arrows). The scale bars represent 200  $\mu\text{m}$  in (A) and 100  $\mu\text{m}$  in (E-F). GUS activity for the *StPTB1* promoter was detected specifically in phloem cells (B-D), both external (EP) and internal phloem (IP). Under higher magnification (D), blue staining could be detected in companion cells (CC) but not sieve elements (SE). Results presented here are representative of several sections from different stem samples.

Figure S9

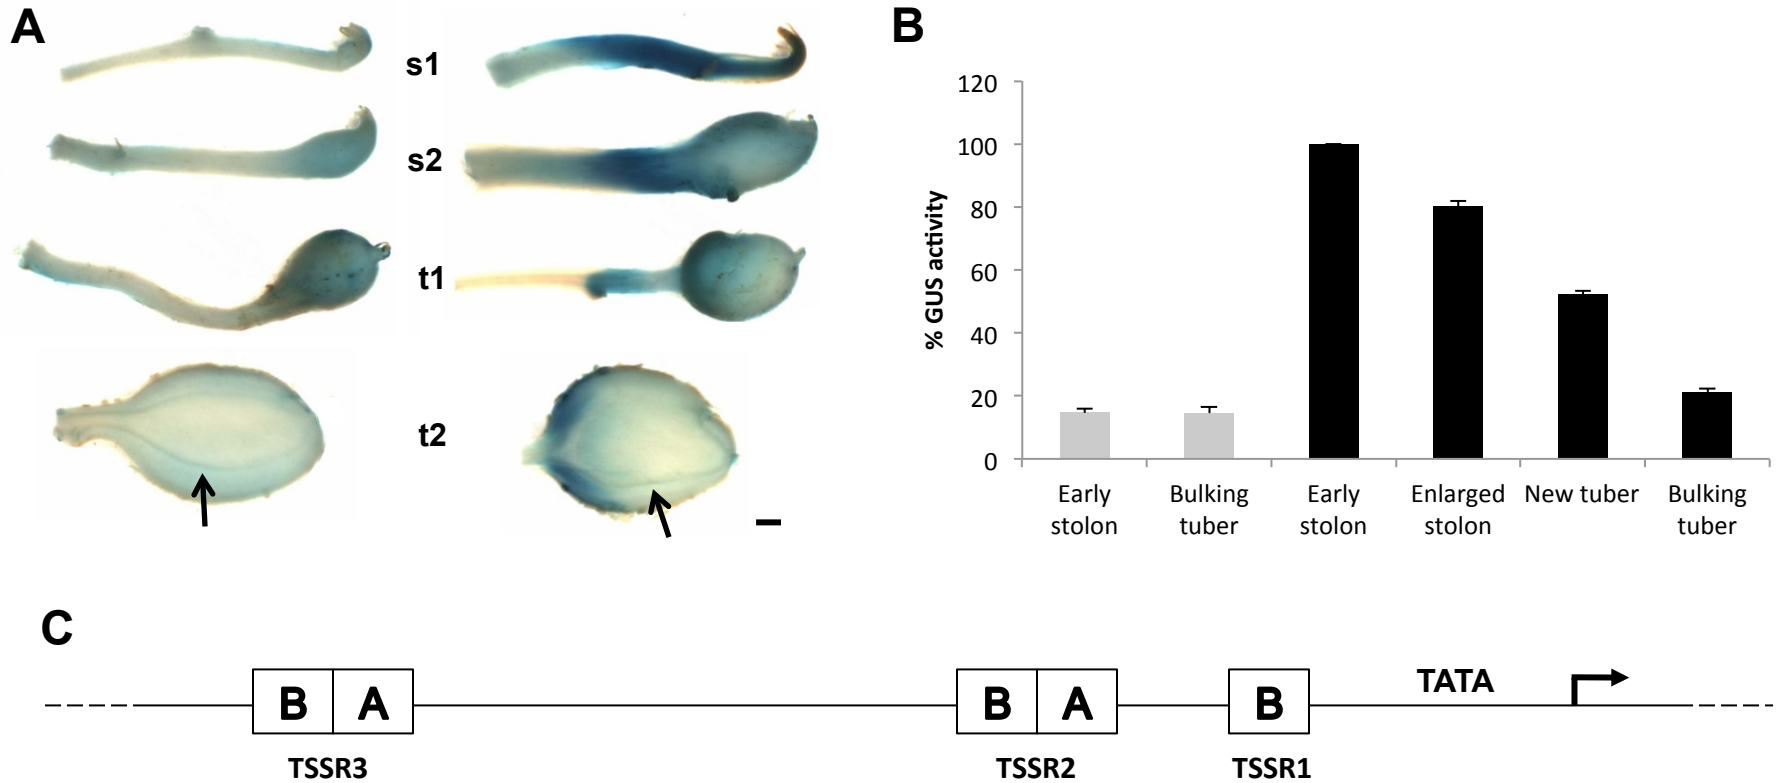

**Figure S9.** GUS activity within stolons and tubers of *StPTB1<sub>prom</sub>* (A, left column) and *StPTB6<sub>prom</sub>* (A, right column) transgenic lines. Stolons and tubers of various developmental stages from eight-week old soil-grown transgenic plants of *StPTB1<sub>prom</sub>* (B, gray bars) and *StPTB6<sub>prom</sub>* (B, black bars) were quantified to assess promoter activity. Two stages of stolon development designated “s1” and “s2” in panel (A) correspond to early and enlarged stolon stages, respectively. The two tuber developmental stages designated “t1” and “t2” correspond to new and bulking tuber stages, respectively. The arrows on the t2 tubers (A) indicate GUS activity in the vascular strands. Similar materials from panel A were used for quantification (B) and are shown as means of three replicate samples from four plants with standard errors. The presence of two complete and one incomplete tuber-specific sucrose responsive elements (TSSR1-3, panel C) were discovered upstream of the *StPTB6* transcriptional start site (arrow) based on *cis*-regulatory elements described in the promoters of patatin and proteinase inhibitor II genes (Butler and Hannapel, 2012). Percent GUS activity (B) was normalized to early stolon activity of the *StPTB6<sub>prom</sub>*. The scale bar in (A) represents 1.0 mm.

**Figure S10**

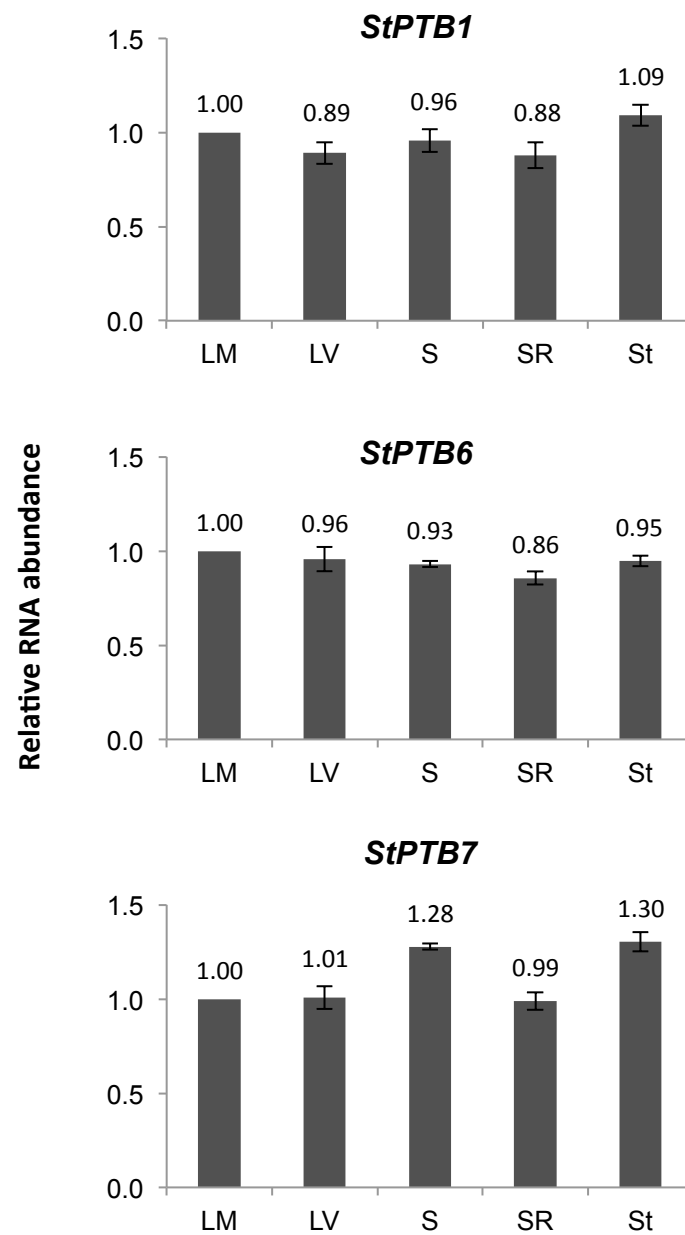

**Figure S10.** Relative levels of mRNAs for *StPTB1*, -6, and -7 in various organs of *Solanum tuberosum* ssp. *andigena* plants grown under long-day conditions. One-step RT-PCR was performed using 150 ng of total RNA and gene-specific primers. All PCR reactions were standardized and optimized to yield product in the linear range. Homogenous PCR products were quantified by using ImageJ software (Abramoff et al., 2004) and normalized by using 18S rRNA values. Standard errors of the means of three biological replicates are shown. LM, leaf mesophyll; LV, leaf veins; S, stem; SR, secondary roots; and St, stolon tips.

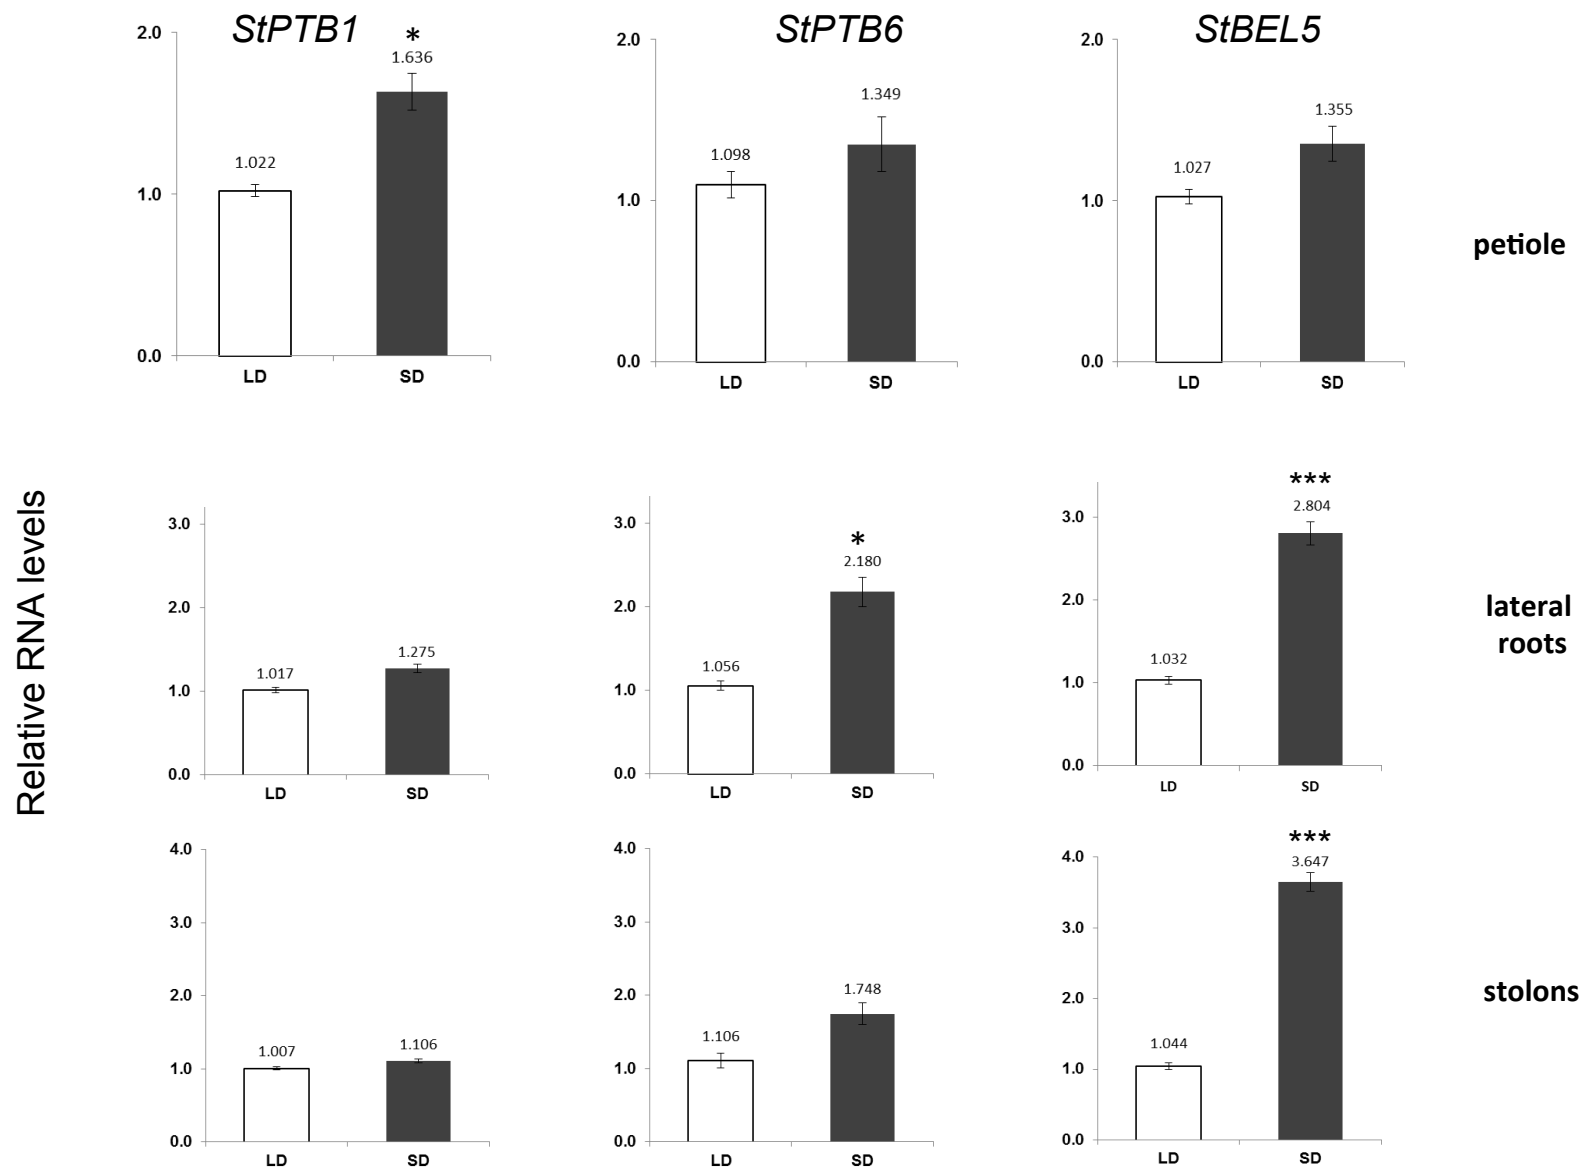

**Figure S11.** Effect of photoperiod on transcript accumulation of *StPTB1* and -6 in petioles, lateral roots, and stolons from potato (*S. tuberosum* ssp. *andigena*). Short-day plants were harvested after 14d of SD conditions (8h light, 16h dark). Quantitative real-time RT-PCR with gene-specific primers was used to calculate the relative amounts of RNA for each *StPTB* gene. *StBEL5* was included as a positive control. Each sample was measured in triplicate and normalized against *StActin8* RNA. The fold change in expression was calculated as the  $2^{-\Delta\Delta C_t}$  value relative to the mean values obtained in the long-day (LD) samples. Standard errors of the means of three biological replicates are shown with one asterisk indicating a significant difference ( $p < 0.05$ ) using a Student's *t* test.

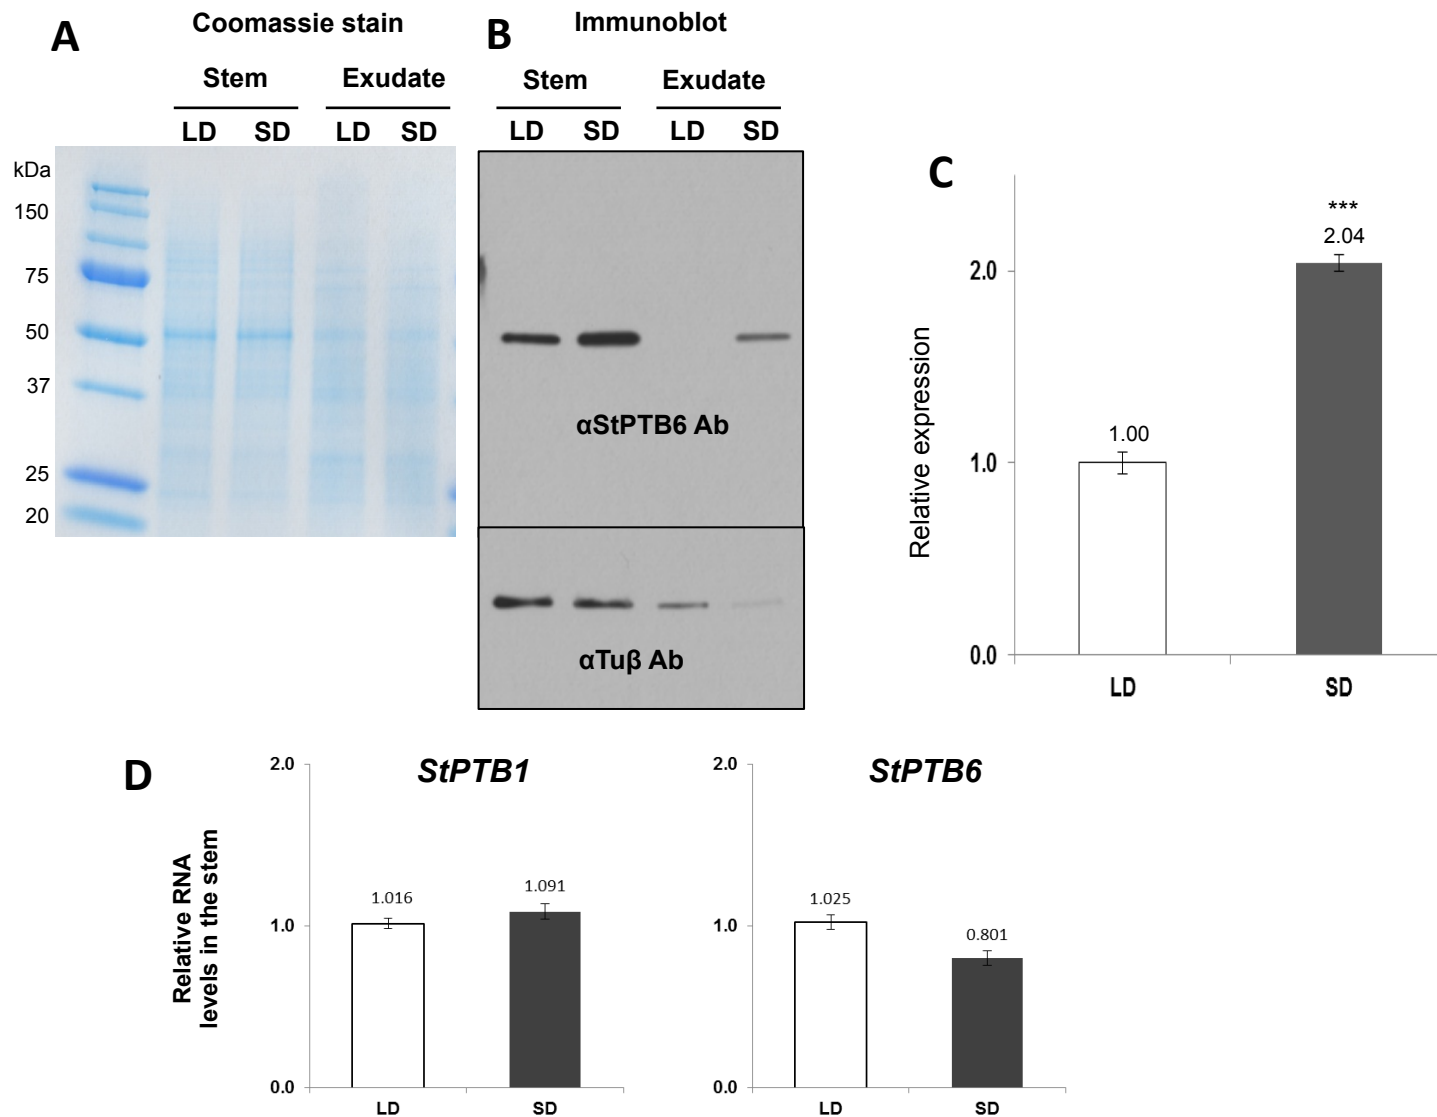

**Figure S12.** Immunodetection of StPTB proteins in stem and stem exudate of *S. tuberosum* ssp. *andigena* grown under long- (LD) or short-day (SD) conditions (A). Immunodetection was performed using either antibody to StPTB6 (B, upper panel) or tubulin (B, lower panel) protein. The StPTB6 antibody recognizes both StPTB1 and -6 (Figures S6-7). To collect stem exudate, stems of *Solanum tuberosum* ssp. *andigena* plants grown under long- or short-day conditions were cut into 0.5 cm pieces and centrifuged at 10,000xg for 2 min in 1.5 ml Eppendorf tubes. After spinning, the stem exudate was collected and proteins were extracted with SDS buffer (Laemmli, 1970). Forty  $\mu$ g of proteins from stems and exudate were separated using Any kD resolving gel (Bio-Rad), and stained using GelCode Blue Stain reagent (Thermo Scientific). The proteins were transferred to Immobilon-P transfer membranes (Millipore), stained with MemCode Reversible Protein Stain kit (Thermo Scientific) to confirm transfer efficiency, and incubated with  $\alpha$ -StPTB6 or  $\alpha$ -tubulin antibody (Santa Cruz). The antibody interactions were visualized using the ECL plus detection kit (GE Healthcare) and CL-Xposure (Thermo Scientific) according to the manufacturer's instructions. Signal intensities were quantified by ImageJ software (Abramoff et al., 2004), normalized with tubulin (C). Standard errors of the means of three biological replicates are shown with three asterisks indicating a significant difference ( $p < 0.001$ ) using a Student's *t* test. RNA levels of *StPTB1* and -6 from stems of *andigena* plants grown under LD or SD were measured using qRT-PCR (D).

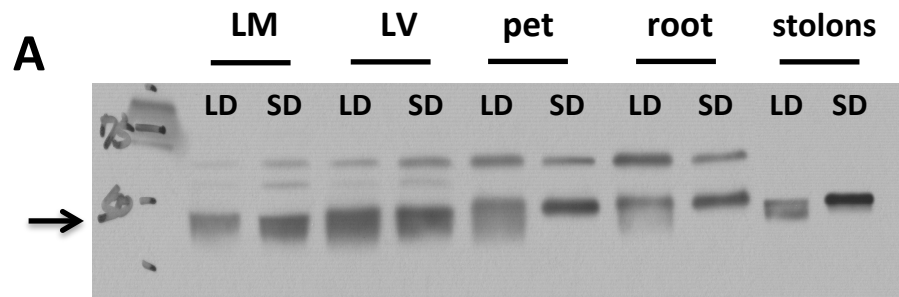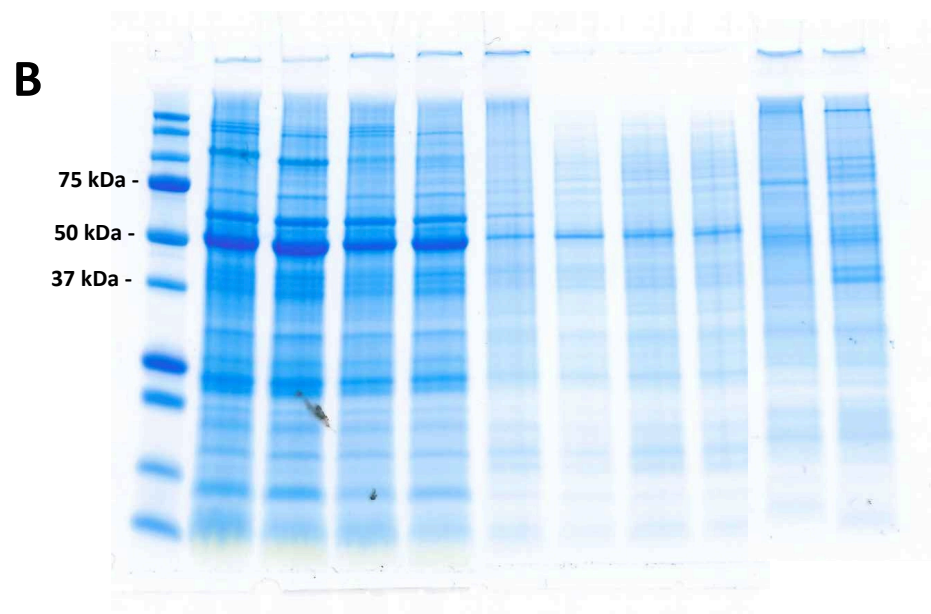

**Figure S13.** Immunoblot (A) of protein extracted from several organs from the photoperiod-sensitive potato, *S. tuberosum* ssp. *andigena*, grown under long-day (LD) and short-day (SD) conditions. LM, leaf mesophyll; LV, leaf vein; pet, petiole. LD plants were grown under LD for 21d. SD plants were grown under LD for 21d and then transferred to SD for 10d. The arrow in A indicates the band for the StPTB proteins at approximately 50 kDa. Coomassie blue-stained proteins and markers loaded onto the gel for transfer are shown in panel B.

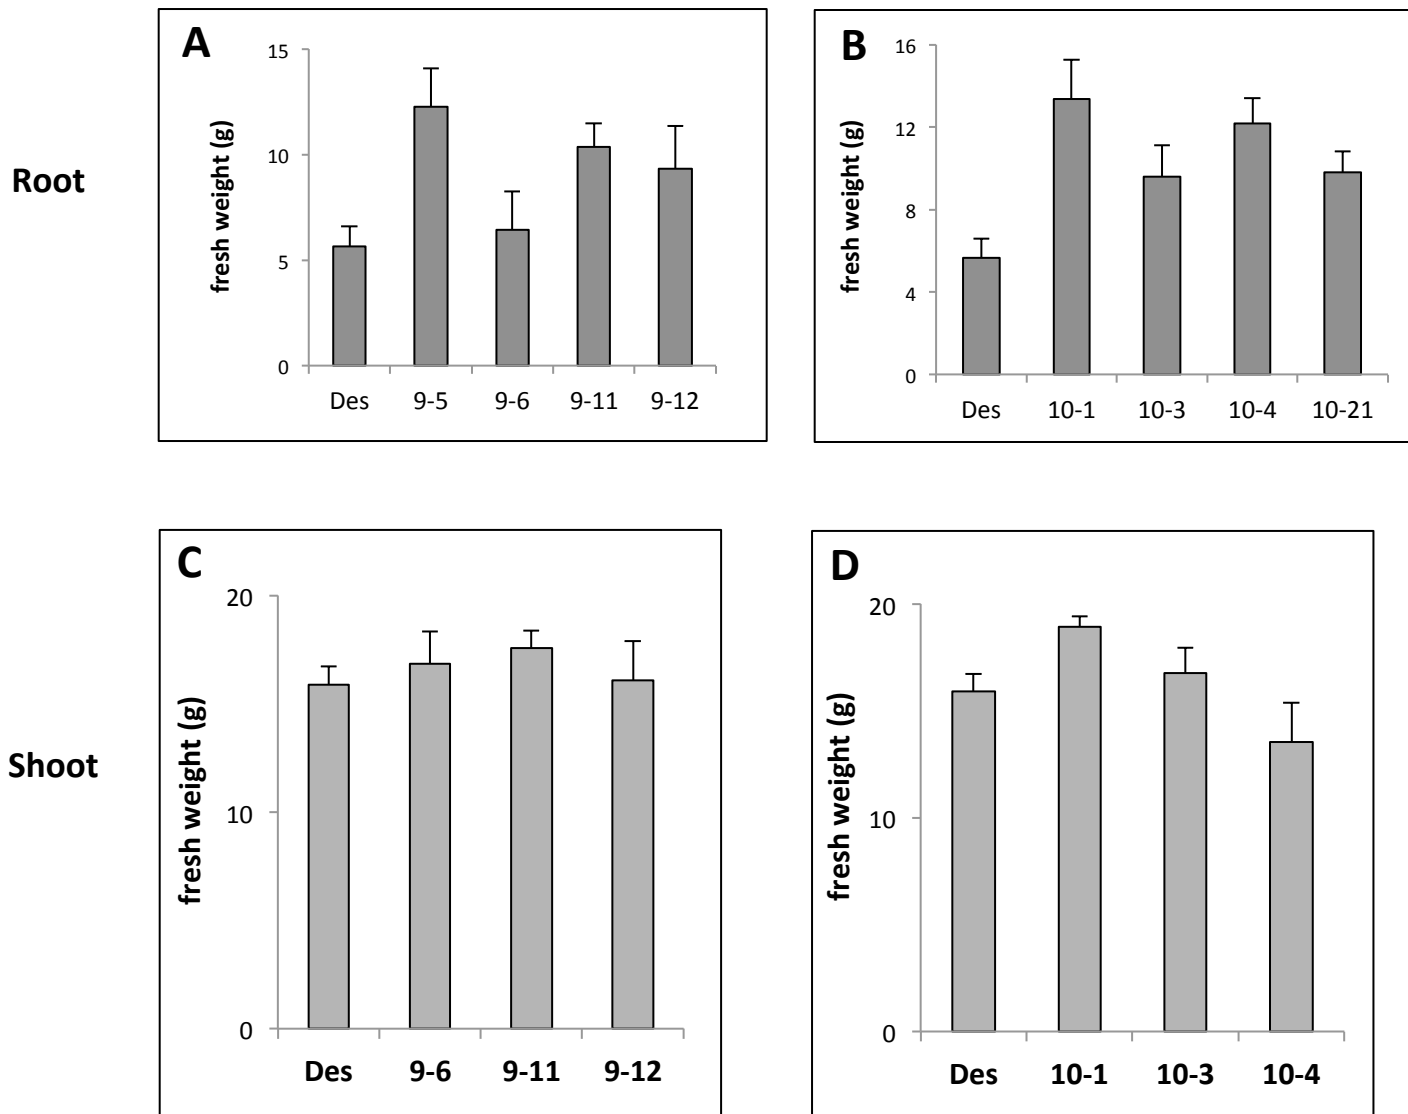

**Figure S14.** Morphological analyses of StPTB1 (A, C) and -6 (B, D) OE lines. Three or four replicates from selected lines were grown in vitro to a size of approximately 5 cm for two to three weeks before being transferred to soil. Plantlets were allowed to grow in 6-cm pots for two weeks and then transferred to 10-cm pots for the remainder of the experiment. Root (A-B) and shoot (C-D) fresh weight were scored from day 45 plants. All plants were grown under long-day conditions (16h light, 8 h dark) with a fluence rate of  $300 \mu\text{mol m}^{-2} \text{s}^{-1}$  at  $24^\circ\text{C}$  and  $18^\circ\text{C}$  using a 12-h diurnal temperature cycle. Des, non-transgenic potato cv Désirée. The #9 lines are PTB1. The #10 lines are PTB6.

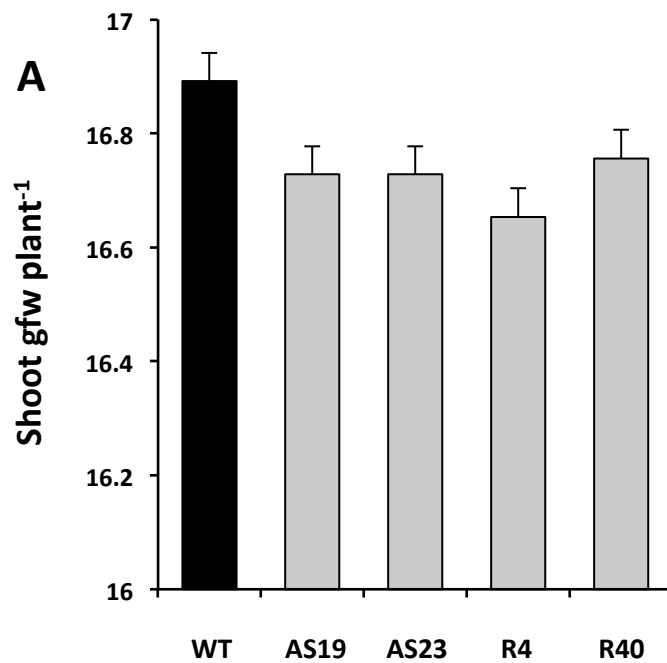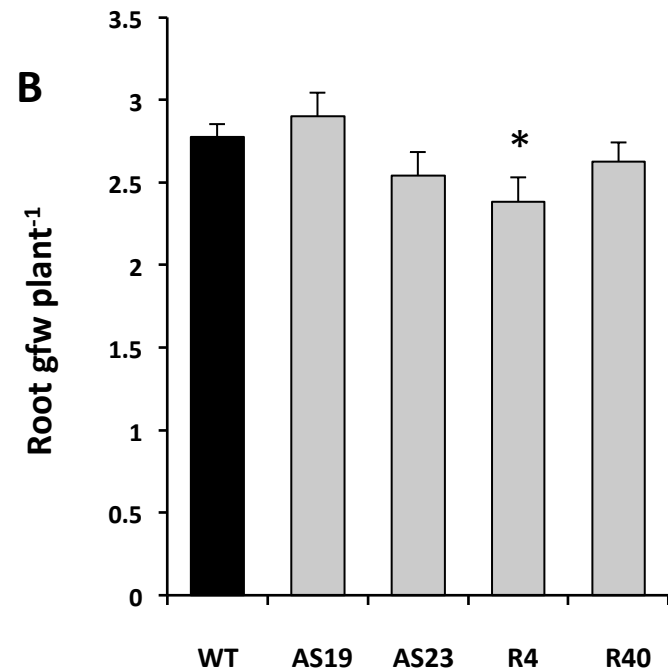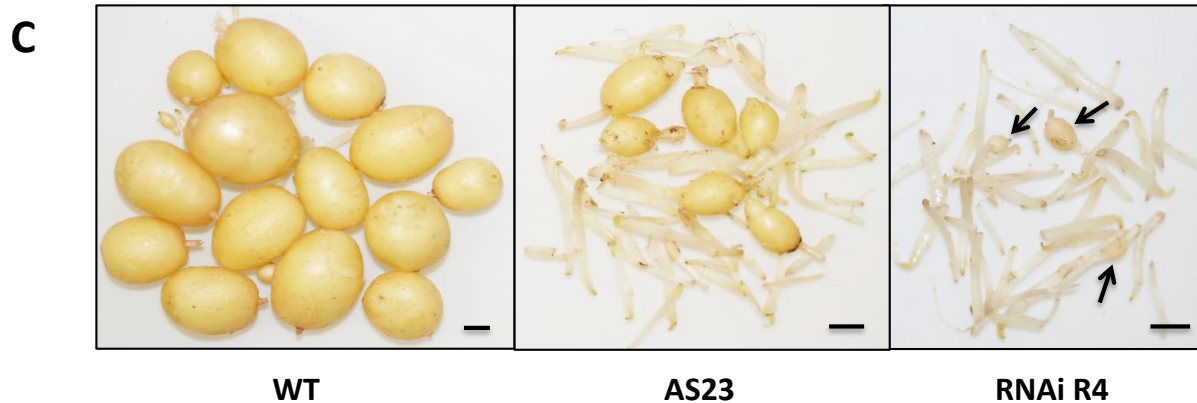

**Figure S15.** Shoot (A) and root (B) fresh wt of RNA suppression lines for *StPTB1* and *StPTB6*. Lines AS19 and AS23 expressed antisense sequence, whereas lines R4 and R40 expressed a RNAi sequence. Both types suppressed expression of both PTB types. *StPTB* RNA levels in stolons for these suppression lines are shown in Fig. 5A. Plants from select RNAi lines were grown in soil in 13-cm pots. Shoot and root yields (g fr wt plant<sup>-1</sup>) were assessed at 30d. Tuber yield from five plants of WT and lines AS23 and R4 harvested at 30d (C). Arrows indicate the small tubers harvested from line R4. Plants were grown under long-day conditions (16h light, 8h dark) with a fluence rate of 300  $\mu\text{mol m}^{-2} \text{s}^{-1}$  at 24 °C during a 12-h day cycle and 18 °C for the remaining time. WT, non-transgenic Désirée control. Standard errors of the means of five plants are shown with the asterisk indicating a significant difference ( $p < 0.05$ ) using a Student's *t*-test. The size bars in D are equivalent to 0.5 cm.



**Table S1. Primers used for RACE, full-length cDNA and Antisense/RNAi cloning.**

| <b>RACE</b>                 | <b>Outer primer (5' to 3')</b>     | <b>Inner (nested) primer (5' to 3')</b> |
|-----------------------------|------------------------------------|-----------------------------------------|
| StPTB1 5' RACE              | TTGAGAGGATTGGCCCTTCT               | AAAGCTTGAAAACCAGCCGA                    |
| StPTB1 3' RACE              | GAATTCCTTAGTACAATAC                | ACTAACCCAAATCTACCATC                    |
| StPTB6 5' RACE              | CCTTATGCTGGGCTGAACAT               | AAAGGGCTGAAATAGCTGAA                    |
| StPTB6 3' RACE              | ATGTACCCCTGGCAAGTTCT               | TCGTTTTCTCAGGTGCAAAGCATCTGAGA           |
| StPTB6 5' RACE              | CCTTATGCTGGGCTGAACAT               | AAAGGGCTGAAATAGCTGAA                    |
| StPTB6 3' RACE              | ATGTACCCCTGGCAAGTTCT               | TCGTTTTCTCAGGTGCAAAGCATCTGAGA           |
| StGAI 5' RACE               | CCATAGCCATCTCAAGTTG                | GCTCATCCATTCCTGCATC                     |
| StGAI 3' RACE               | CGATGGTTACAGAGTGGA                 | TTATAGCAACCTCCGCCT                      |
| <b>For Full-length cDNA</b> | <b>Forward primer (5' to 3')</b>   | <b>Reverse primer (5' to 3')</b>        |
| StPTB1                      | AAACCCTAGTCCCCCTCTCCCTTTCCTCCATT   | TTTTTTTTTTTACATAAGGAAAGCAG              |
| Truncated StPTB1            | AAACCCTAGTCCCCCTCTCCCTTTCCTCCATT   | TTTTTTTTTTTGTAAAGATCGACAAT              |
| StPTB6                      | ATTCTATCTGGTCTTTCAAGCCCTAATT       | TTTTTAACAAACACAGAAGAAAGGAAGCA           |
| Truncated StPTB6            | ATTCTATCTGGTCTTTCAAGCCCTAATT       | TTTTTTTTTTTGAAGAAAGAATCTTACATCTGGA      |
| StPTB7                      | CCCAAAGGAAAGAAGCAGTACTCAAAGTCCGTAA | TTTTTTTTTTTGCAGATGAATCTTTTCCA           |
| StGAI                       | GATATCTTCACGAGCACTTCT              | TTTTTTTTTTCCCAAACACCAAAT                |
| <b>For Antisense/RNAi</b>   | <b>Forward primer (5' to 3')</b>   | <b>Reverse primer (5' to 3')</b>        |
| PTB6AS                      | GAGCTCTTCATGTTTCGCAACGTGGGCCA      | ACTAGTTCATATCCTTGTGAGGAGATTG            |
| PTB6RNAi                    | CACCTTCATGTTTCGCAACGTGGGCCA        | TCCATATCCTTGTGAGGAGATTG                 |

**Table S2. Accession numbers of PTB proteins**

| <b>Protein</b> | <b>Accession/Gene ID</b> | <b>Protein</b> | <b>Accession/Gene ID</b> |
|----------------|--------------------------|----------------|--------------------------|
| HnRNP I        | AAC99798.1               | Barley1        | TC217740                 |
| StPTB1         | JF710641                 | Barley2        | BAJ92028                 |
| StPTB6         | JF710642                 | Barley3        | BAJ94455                 |
| StPTB7         | JF710643                 | Rice1          | LOC_Os05g36120           |
| TC201749       | TC201749                 | Rice2          | LOC_Os01g64770           |
| CmRBP50        | ACI43571                 | Rice3          | LOC_Os03g25980           |
| AtPTB1         | At3g01150                | Rice4          | LOC_Os08g33830           |
| AtPTB2         | At5g53180                | Rice5          | LOC_Os01g43170           |

|            |                        |           |                          |
|------------|------------------------|-----------|--------------------------|
| AtPTB3     | At1g43190              | Maize1    | NP_001169470             |
| Populus1   | XP_002302167           | Maize2    | NP_001169809             |
| Populus2   | XP_002306709           | Maize3    | NP_001151769             |
| Populus3   | ABK95931               | Maize4    | NP_001137030             |
| Populus4   | XP_002324068           | Soybean1  | ACU20184                 |
| Populus5   | ABK95840               | Soybean2  | TC392885                 |
| Populus6   | XP_002322027           | Soybean3  | ACU23122                 |
| Sunflower1 | TC53857                | Soybean4  | ACU18422                 |
| Sunflower2 | TC47059                | Medicago1 | TC148772/Medtr1g098530.1 |
| Tobacco1   | TC84265                | Medicago2 | Medtr6g043520.1          |
| Tobacco2   | TC78548                | Medicago3 | Medtr6g012590.1          |
| Tobacco3   | TC80926                | Medicago4 | Medtr3g090960.1          |
| Tobacco4   | TC100085               | Medicago5 | Medtr7g011070.1          |
| Tomato1    | TC227660               | Cucumber1 | Csa005592                |
| Tomato2    | BF098030               | Cucumber2 | Csa015458                |
| Tomato3    | TC229790               | Cucumber3 | Csa009211                |
| Tomato4    | TC231069               | StBEL5    | AF406697                 |
| Wheat1     | TC403305               | StGAI     | JF834157                 |
| Wheat2     | TC377105               | CmGAI     | AY326306                 |
| Wheat3     | TC386686               | POTH1     | U65648                   |
| Sorghum1   | XP_002441164/09g021560 | StGA2ox1  | EU003995                 |
| Sorghum2   | XP_002444395/07g021250 | StGA20ox1 | AJ291453                 |
| Sorghum3   | XP_002467789/01g034060 |           |                          |

**Table S3. Gene-specific primers used for RT-PCR.**

| Gene      | Primer sequences (5' to 3') |                      | Amplicon (bp)                           |
|-----------|-----------------------------|----------------------|-----------------------------------------|
|           | Forward primer              | Reverse primer       |                                         |
| StPTB1    | ATATGGAGACATGTACTCC         | GGTTTATTGCGCAGAATC   | 246                                     |
| StPTB6    | TTTCTCAGATGGGAAATGC         | CTGGTCCGGTGTTAATATTT | 331                                     |
| StPTB7    | CAACAGCAGTTCGGTAC           | ATTGCCTGATTAAGGTCA   | 188                                     |
| StPTB1-1  | GCCGTGGAGATGAGGTTTTCA       | GGTCCATATAAATCAAGTGA | 122                                     |
| StPTB6-1  | GAGGAGATGAGGTTTTCA          | ATTTGCCCTTCGGCTCTGAT | 212                                     |
| StPTB6-2  | TTTCAGAAGTCGGCCGGTT         | AGAGAGATGCACACCTGA   | 393 (6-2.1), 314 (6-2.2)                |
| StBEL5    | GGGAGATTTTGGAAAGGTTTG       | TCAAATTTGGGTCTCCGACT | 375                                     |
| StGAI     | AGCTGAAACAATCGGAGTTG        | CATTGAACCCAGATGAACC  | 527                                     |
| 18S       | GGATGTTGCTTTTAGGACTC        | CATCACAGACCTGTTATTGC | 315                                     |
| GA20ox1AS | GAGAAGCCTTGTCGGTAGT         | GAAGTCCGCCAACACAATCT | GA20ox1 Intron (WT: 649 bp, AS: 848 bp) |

**Table S4. Primers used for various constructs used in this report.**

| 4-1. For cloning into pACT2 Yeast Protein Vector        |                                              |                                             |
|---------------------------------------------------------|----------------------------------------------|---------------------------------------------|
| Gene                                                    | Forward Primer (5' to 3')                    | Reverse Primer (5' to 3')                   |
| CmRBP50                                                 | tacggatccacATGACTGAACCCTCAAAG (BamHI)        | ctcgagctcTATACTCTGCAGCTGGGA (SacI)          |
| StPTB1                                                  | tacggatccacATGTCTGATCCTTCAAA (BamHI)         | cgatctcgggGATGCTCTGTAAGTGA (XhoI)           |
| StPTB6                                                  | tacggatccacATGACTGAGCCGTCAAAA (BamHI)        | ctcgagctcGATGCTTTGCACCTGAGA (SacI)          |
| StPTB7                                                  | tacggatccacATGTCAACATCCGGGCA (BamHI)         | cgatctcgggACCATGATAAGGTGCAT (XhoI)          |
| 4-2. For cloning into pIII/MS2-1 Yeast RNA vector       |                                              |                                             |
| Gene                                                    | Forward Primer (5' to 3')                    | Reverse Primer (5' to 3')                   |
| CmGAI3                                                  | atccccgggTCATCCTGACCCTT (SmaI)               | cagccccgggATACATAAATCCTT (SmaI)             |
| CmGAI10                                                 | atccccgggATTTCACCGCAAT (SmaI)                | cagccccgggAAAGCCGGCCACTG (SmaI)             |
| StBEL5 3'UTR                                            | atccccgggATACAGAAAGTCTCGTA (SmaI)            | cagccccgggGCTAATCTAATAATGATA (SmaI)         |
| StBEL5 T1                                               | atccccgggACTCTTATATTGTG (SmaI)               | cagccccgggAAAGAAGTATATAT (SmaI)             |
| StBEL5 N                                                | atccccgggGAAGAGGTGGAGCA (SmaI)               | cagccccgggTGTATGATTGGCT (SmaI)              |
| StGAI 3' UTR                                            | atccccgggTTATAAGTCAGCCT (SmaI)               | cagccccgggTAAGATAAATAAATA (SmaI)            |
| 4-3. For promoter cloning into pBI101:GUS vector        |                                              |                                             |
| Gene                                                    | Forward primer (5' to 3')                    | Reverse primer (5' to 3')                   |
| StPTB1                                                  | agtgtcgacGGTCTGTCCGACTTCCATC (Sall)          | gtcggatccGGATCAGACAATTATACCTGAATCAC (BamHI) |
| StPTB6                                                  | agtgtcgacGCACAATAGCGATAAAATGACATAGTTC (Sall) | gtcggatccCGGCTCAGTCAATTTTACCTGAATC (BamHI)  |
| 4-4. For pBI121-GFP vector and 35S:StPTB-GFP constructs |                                              |                                             |
| Gene                                                    | Forward primer (5' to 3')                    | Reverse primer (5' to 3')                   |
| GFP (for pBI121-GFP)                                    | tagaggatccATGGTGAGCAAGGGCGA (BamHI)          | aattcgagctcTTACTTGTACAGCTCGT (SacI)         |
| StPTB1                                                  | tactctagaATGTCTGATCCTTCAAA (XbaI)            | cgatggatccGATGCTCTGTAAGTGA (BamHI)          |
| StPTB6                                                  | tactctagaATGACTGAGCCGTCAAAA (XbaI)           | cgatggatccACCATGATAAGGTGCAT (BamHI)         |
| StPTB7                                                  | tactctagaATGTCAACATCCGGGCA (XbaI)            | cgatggatccACCATGATAAGGTGCAT (BamHI)         |

**Table S5. Primers for quantitative RT-PCR, RIP and mobility assay (RMA)**

| Name                     | Primer sequence                                          | Purpose                            |
|--------------------------|----------------------------------------------------------|------------------------------------|
| StBEL5F                  | CTGCAACAGCTAGGAATGATG                                    | <i>StBEL5</i> real-time PCR primer |
| StBEL5R                  | ATGATTTTGTCTGAATCCTTTGGG                                 | (amplicon 137 bp)                  |
| Ga2Ox1F                  | AGTCCCACCTGATCCCTAC                                      | <i>Ga2Ox1</i> real-time PCR primer |
| Ga2Ox1R                  | GCCCTCCAAAGTAAACCATTG                                    | (amplicon 143 bp)                  |
| StPTB1P                  | GCGCAATAAACCAGATCATGC                                    | <i>StPTB1</i> real-time PCR primer |
| StPTB1R                  | GTTGACTTCCAGACGCTTTTC                                    | (amplicon 112 bp)                  |
| StPTB6F                  | TCATGCTCTTGTTTCAGATGGG                                   | <i>StPTB6</i> real-time PCR primer |
| StPTB6R                  | TGGTCCGGTGTTAATATTTGGG                                   | (amplicon 150 bp)                  |
| StPIN1F                  | GCACCAAATCCTGGCATGT                                      | <i>StPIN1</i> real-time PCR primer |
| StPIN1R                  | AGCTGTATTCTTGTGTGCTTTGGT                                 | (amplicon 63 bp)                   |
| StPIN4F                  | GTTTCATTGCGGCGGATTC                                      | <i>StPIN4</i> real-time PCR primer |
| StPIN4R                  | CCCATAGCGAAAGAACAACC                                     | (amplicon 60 bp)                   |
| B5H-F (w <i>Mlu</i> I)   | tctACGCGTTTTCTCAAAGCTTAGAGAGC                            | Construction of PVX/B5H for RMA    |
| B5H-R (w <i>Eco</i> RV)  | tctGATATCGTGGTGATGGTGATGATGGCTAATCTAATAATGATAGCAC        | of <i>StBEL5</i>                   |
| B14H-F (w <i>Mlu</i> I)  | tctACGCGTGATCATGGTCCTTCGTCTTCTAAG                        | Construction of PVX/B5H for RMA    |
| B14H-R (w <i>Eco</i> RV) | tctGATATCGTGGTGATGGTGATGATGTATCATCATTTCATCACCAATATATATTA | of <i>StBEL14</i>                  |
| GFP-F                    | ATGAGTAAAGGAGAAGAAGACTTTTCACTGGAG                        | GFP RT-PCR primer for RMA (Li et   |
| GFP-R                    | TTTGTGTCCAAGAATGTTTCCATCTTC                              | al, 2009)                          |
| PVX-F                    | CAAGGTGCGCGAGGTTTACCAATC                                 | PVX RT-PCR primer for RMA (Li et   |
| PVX-R                    | GTATGCTGTTTCCGTTGTGATCTCTGTGAG                           | al, 2009)                          |
| B5HNP2F                  | GTTGTGATATTGTTCCCTCTCAATTTGC                             | Real-time PCR of B5H for RMA       |
| B5HNP2R                  | ATCGTGGTGATGGTGATGATGGCT                                 | (amplicon 151 bp)                  |
| B14HF                    | TGGATAGTGAAAATCAGAATTTGCC                                | Real-time PCR of B14H for RMA      |
| B14HR                    | ATCGTGGTGATGGTGATGATGTATCATC                             | (amplicon 142 bp)                  |
| 18SF                     | GGGCATTTCGTATTTTCATAGTCAGAG                              | 18S rRNA RT-PCR primer (Nicot et   |
| 18SR                     | CGGTTCTTGATTAATGAAAACATCCT                               | al, 2005)                          |
| StAct8F                  | GGAAAAGCTTGCCTATGTGG                                     | Actin8 real-time PCR primer        |
| StAct8R                  | CTGCTCCTGGCAGTTTCAA                                      | (Hannapel et al, 2013)             |

|          |                                |                               |
|----------|--------------------------------|-------------------------------|
| RIPB22F  | AACATTTGGGACCACTACGG           | BEL22 RIP qRT-PCR             |
| RIPB22R  | ATCATAATTTATGTAGCAGTGTTTGAATAC | BEL22 RIP qRT-PCR             |
| RIPB5R   | ATTTTGTTACTTTAATTTAGTCTCCACTTC | BEL5 RIP qRT-PCR              |
| RIPB5F   | TCTTATATTGTGTGAGGCCTTCTG       | BEL5 RIP qRT-PCR              |
| BEL5GSP2 | GTGATATTGTTCCCTCTCAATTTGCA     | GSP for heterograft RNA assay |
| NT-2     | GCAACAGGATTCAATCTTAAGAACT      | GSP for heterograft RNA assay |

---
